# Supplementary material for: Ultrathin sulfate-intercalated NiFe-layered double hydroxide nanosheets for efficient electrocatalytic oxygen evolution
Source: Royal Society of Chemistry journal article supplement (doi:10.1039/d0ra00845a), 2020-01-01
Supplement: d0ra00845a1.pdf [file d0ra00845a1.pdf]

## Electronic Supplementary Information

### Ultrathin sulfate-intercalated NiFe-layered double hydroxides nanosheets for efficient electrocatalytic oxygen evolution

Xiao-Xiao Jiang,<sup>a,b</sup> Jiang-Yan Xue,<sup>a</sup> Zhong-Yin Zhao,<sup>a</sup> Cong Li,<sup>a</sup> Fei-Long Li,<sup>c\*</sup> Chen Cao,<sup>a</sup>  
Zheng Niu,<sup>a\*</sup> Hong-Wei Gu,<sup>a</sup> and Jian-Ping Lang<sup>a,b,\*</sup>

<sup>a</sup>*College of Chemistry, Chemical Engineering and Materials Science, Soochow University, Suzhou  
215123, People's Republic of China*

<sup>b</sup>*State Key Laboratory of Organometallic Chemistry, Shanghai Institute of Organic Chemistry,  
Chinese Academy of Sciences, Shanghai 200032, People's Republic of China*

<sup>c</sup>*School of Chemistry and Materials Engineering, Changshu Institute of Technology, Changshu  
215500, Jiangsu, People's Republic of China*

\* Correspondence authors at: *College of Chemistry, Chemical Engineering and Materials Science,  
Soochow University, Suzhou 215123, People's Republic of China.*

Tel: +86-512-65882865; fax: +86-512-65880328.

*E-mail address:* [jplang@suda.edu.cn](mailto:jplang@suda.edu.cn) (J.P. Lang).

## Contents

|                                                                                                                                                                                                                                                                    |     |
|--------------------------------------------------------------------------------------------------------------------------------------------------------------------------------------------------------------------------------------------------------------------|-----|
| <b>Fig. S1</b> (a) TEM image and (b) PXRD patterns of the products obtained under similar conditions of U-LDH(SO <sub>4</sub> <sup>2-</sup> ) except that only water was used as the reaction solvent.....                                                         | S3  |
| <b>Fig. S2</b> (a) TEM image and (b) PXRD patterns of the products obtained under similar conditions of U-LDH(SO <sub>4</sub> <sup>2-</sup> ) except that only DMAC was used as the reaction solvent.....                                                          | S3  |
| <b>Fig. S3</b> EDX spectrum of U-LDH(SO <sub>4</sub> <sup>2-</sup> ).....                                                                                                                                                                                          | S4  |
| <b>Fig. S4</b> (a) SEM image, b) TEM image and (c) PXRD patterns of B-LDH(CO <sub>3</sub> <sup>2-</sup> ).....                                                                                                                                                     | S4  |
| <b>Fig. S5.</b> XPS spectra of B-LDH(CO <sub>3</sub> <sup>2-</sup> ): (a) survey scan, (b) Ni 2p, (c) Fe 2p, (d) O 1s, (e) C 1s, (f) F 1s.....                                                                                                                     | S5  |
| <b>Fig. S6</b> FT-IR spectra of U-LDH(SO <sub>4</sub> <sup>2-</sup> ) and B-LDH(CO <sub>3</sub> <sup>2-</sup> ).....                                                                                                                                               | S5  |
| <b>Table S1</b> Comparisons of OER performance for Fe/Ni-based and LDH-based electrocatalysts in 1 M KOH. ....                                                                                                                                                     | S6  |
| <b>Fig. S7</b> TEM images of U-LDH(SO <sub>4</sub> <sup>2-</sup> ) after 1000 CV cycles. ....                                                                                                                                                                      | S8  |
| <b>Fig. S8</b> XPS spectra of U-LDH(SO <sub>4</sub> <sup>2-</sup> ) after 1000 CV cycles: (a) survey scan, (b) O 1s, (c) C 1s, (d) S 2p. ....                                                                                                                      | S8  |
| <b>Fig. S9</b> (a) SEM image, (b) TEM image, (c) PXRD patterns of Ni(OH) <sub>2</sub> . ....                                                                                                                                                                       | S9  |
| <b>Fig. S10</b> CV curves of Ni(OH) <sub>2</sub> and U-LDH(SO <sub>4</sub> <sup>2-</sup> ) at a scan rate of 5 mV·s <sup>-1</sup> .....                                                                                                                            | S9  |
| <b>Fig. S11</b> CV curves in a potential range of 1.22-1.23 V versus RHE of U-LDH(SO <sub>4</sub> <sup>2-</sup> ).....                                                                                                                                             | S10 |
| <b>Fig. S12</b> Photograph of U-LDH(SO <sub>4</sub> <sup>2-</sup> ) prepared in gram-scale: (a) U-LDH(SO <sub>4</sub> <sup>2-</sup> ) prepared in a 1 L reactor, b) powder of U-LDH(SO <sub>4</sub> <sup>2-</sup> ) weighed on a precision electronic balance..... | S10 |
| <b>Fig. S13</b> (a, b) TEM images, (c) PXRD patterns of U-LDH(SO <sub>4</sub> <sup>2-</sup> ) prepared in gram-scale.....                                                                                                                                          | S11 |
| <b>Fig. S14</b> (a) Linear sweep voltammetry OER curve and (b) Tafel plot of U-LDH(SO <sub>4</sub> <sup>2-</sup> ) prepared in gram-scale.....                                                                                                                     | S11 |

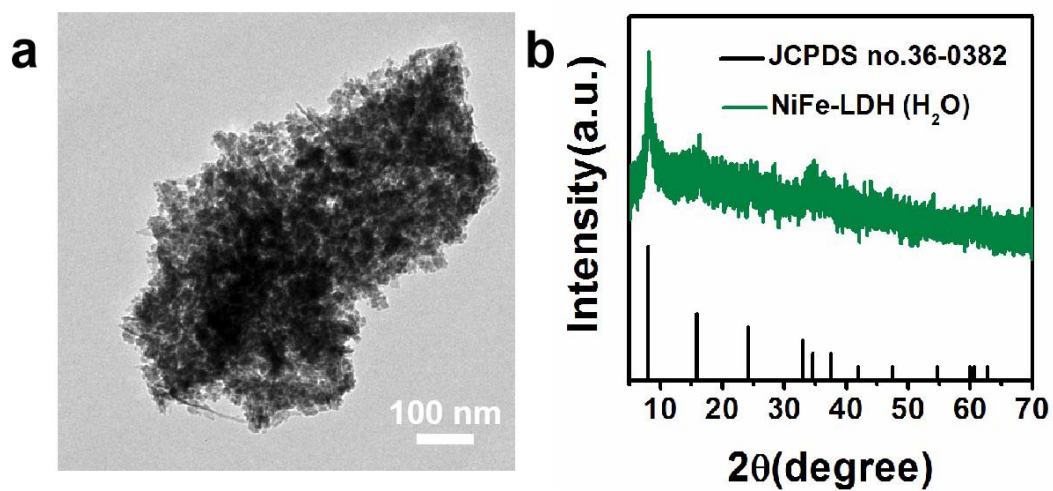

**Fig. S1** (a) TEM image and (b) PXRD patterns of the products obtained under similar conditions of U-LDH( $\text{SO}_4^{2-}$ ) except that only water was used as the reaction solvent.

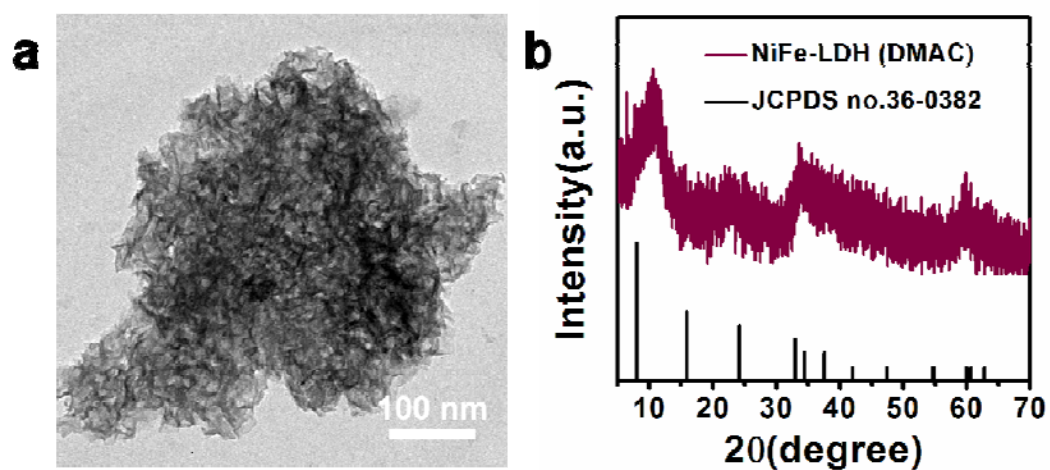

**Fig. S2** (a) TEM image and (b) PXRD patterns of the products obtained under similar conditions of U-LDH( $\text{SO}_4^{2-}$ ) except that only DMAC was used as the reaction solvent.

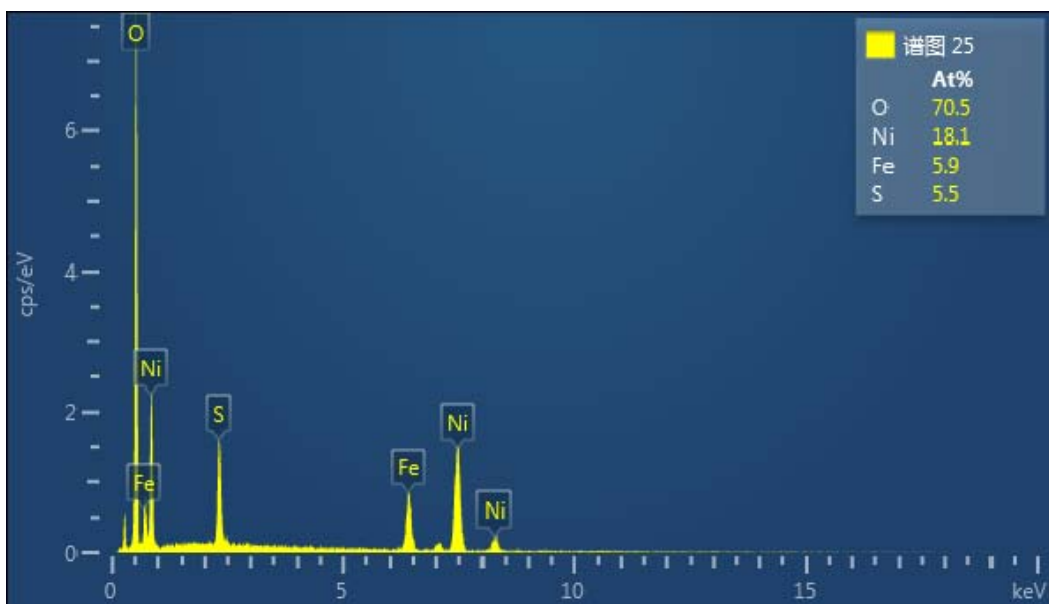

**Fig. S3** EDX spectrum of U-LDH(SO<sub>4</sub><sup>2-</sup>).

**Noted:**  $n(\text{Ni}) : n(\text{Fe}) : n(\text{S}) = 18.1 : 5.9 : 5.5 = 3 : 1 : 0.93$

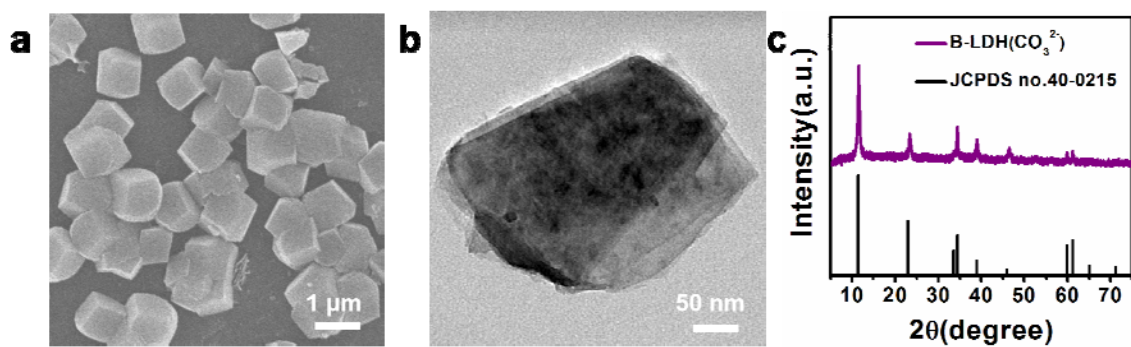

**Fig. S4** (a) SEM image, (b) TEM image and (c) PXRD patterns of B-LDH(CO<sub>3</sub><sup>2-</sup>).

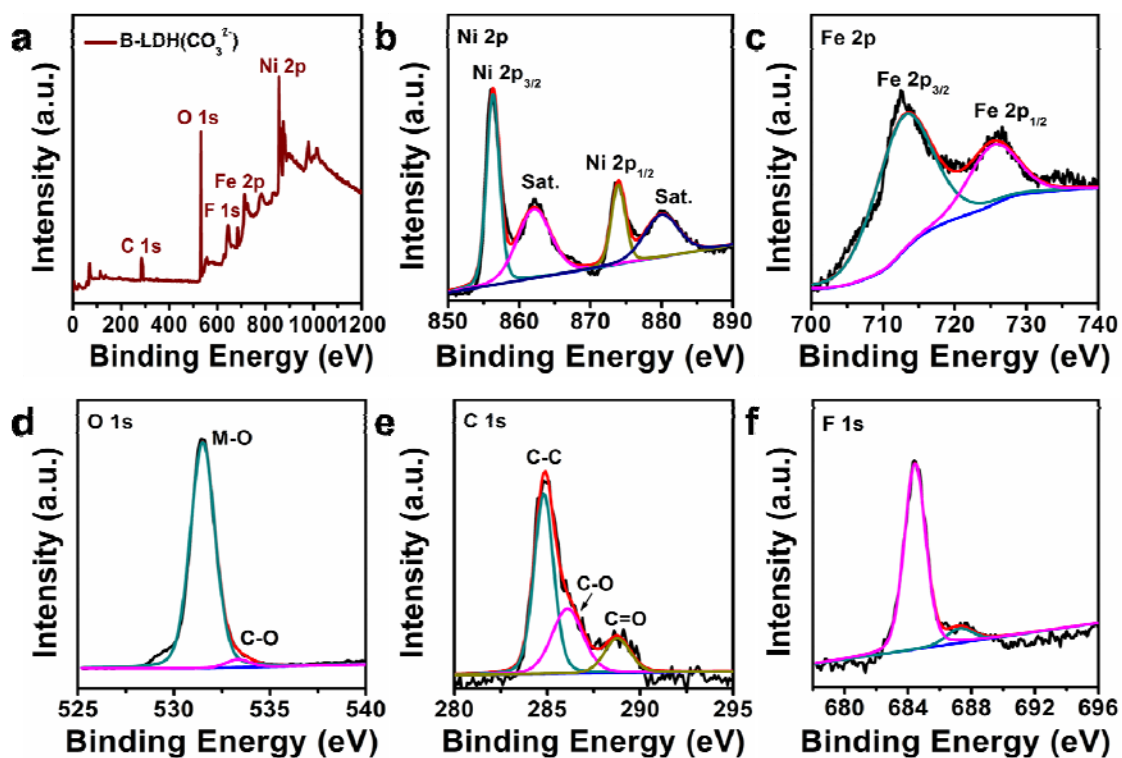

**Fig. S5** XPS spectra of B-LDH(CO<sub>3</sub><sup>2-</sup>): (a) survey scan, (b) Ni 2p, (c) Fe 2p, (d) O 1s, (e) C 1s, (f) F 1s.

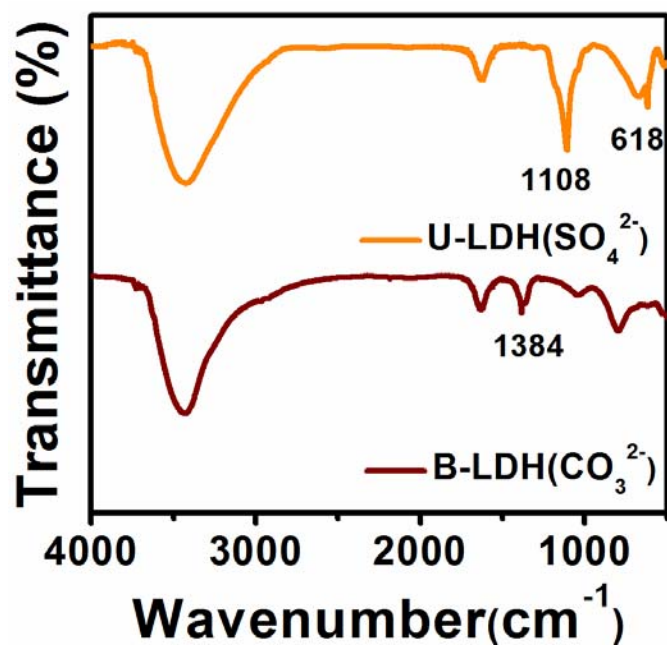

**Fig. S6** FT-IR spectra of U-LDH(SO<sub>4</sub><sup>2-</sup>) and B-LDH(CO<sub>3</sub><sup>2-</sup>).

**Noted:** The peak at 1384 cm<sup>-1</sup> is attributed to ν<sub>3</sub>(CO<sub>3</sub><sup>2-</sup>), while those at 1108 cm<sup>-1</sup> and 618 cm<sup>-1</sup> are attributed to the ν<sub>3</sub>(SO<sub>4</sub><sup>2-</sup>) and ν<sub>4</sub>(SO<sub>4</sub><sup>2-</sup>).

**Table S1** Comparisons of OER performance for Fe/Ni-based and LDH-based electrocatalysts in 1 M KOH.

| Catalysts                                   | Electrode         | Overpotential (mV)<br>at 10 mA·cm <sup>-2</sup> | Tafel slope<br>(mV·dec <sup>-1</sup> ) | Reference                                                        |
|---------------------------------------------|-------------------|-------------------------------------------------|----------------------------------------|------------------------------------------------------------------|
| U-LDH(SO <sub>4</sub> <sup>2-</sup> )       | GCE               | 212                                             | 65.2                                   | <b>This work</b>                                                 |
| SO <sub>4</sub> <sup>2-</sup> (EG) NiFe LDH | Carbon<br>paper   | 375                                             | 56                                     | <i>Chem. Mater.</i> , 2018,<br><b>30</b> , 4321-4330.            |
| NiFe-SO <sub>4</sub>                        | Ni foam           | 356                                             | 93                                     | <i>Chem. Mater.</i> , 2019,<br><b>31</b> , 6798-6807.            |
| Ni-Fe LDH nanoprisms                        | GCE               | 280                                             | 49.4                                   | <i>Angew. Chem. Int.<br/>Ed.</i> , 2018, <b>57</b> ,<br>172-176. |
| Ni/NiO@CoFe LDH                             | Ni/NiO<br>foam    | 230                                             | 34.3                                   | <i>ChemSusChem</i> , 2019,<br><b>12</b> , 2773-2779.             |
| NiFe/Cu <sub>2</sub> O NWs/CF               | Cu foam           | 284                                             | 42                                     | <i>ChemSusChem</i> , 2017,<br><b>10</b> , 1475-1481.             |
| Fe(OH) <sub>3</sub> @Co-MOF-74              | carbon<br>paper   | 292                                             | 44                                     | <i>ChemSusChem</i> , 2019,<br><b>12</b> , 4623-4628.             |
| NiFe-LDH-UF<br>(UF: Ultrafine)              | Graphite<br>paper | 254                                             | 32                                     | <i>Adv. Energy Mater.</i> ,<br>2018, <b>8</b> , 1703585.         |
| NiFe hydroxide                              | GCE               | 270                                             | 36.2                                   | <i>Angew. Chem. Int.<br/>Ed.</i> , 2019, <b>58</b> ,<br>736-740. |
| δ-FeOOH NSs/NF                              | Ni foam           | 265                                             | 36                                     | <i>Adv. Mater.</i> , 2018, <b>30</b> ,<br>1803144.               |
| CoMn-LDH                                    | GCE               | 325                                             | 43                                     | <i>J. Am. Chem. Soc.</i> ,<br>2014, <b>136</b> ,<br>16481-16484. |
| NiFeRu LDH/Ni foam                          | Ni foam           | 225                                             | 32.4                                   | <i>Adv. Mater.</i> , 2018, <b>30</b> ,                           |

|                                                                        |         |     |       |                                                                    |
|------------------------------------------------------------------------|---------|-----|-------|--------------------------------------------------------------------|
|                                                                        |         |     |       | 1706279.                                                           |
| Ni <sub>0.75</sub> Fe <sub>0.125</sub> V <sub>0.125</sub> -LDHs/<br>NF | Ni foam | 231 | 39.4  | <i>Small</i> , 2018, <b>14</b> ,<br>1703257.                       |
| Cu@CoFe LDH                                                            | Cu foam | 240 | 44.4  | <i>Nano Energy</i> , 2017,<br><b>41</b> , 327-336.                 |
| CoFe LDHs-Ar                                                           | GCE     | 266 | 37.85 | <i>Angew. Chem. Int.<br/>Ed.</i> , 2017, <b>56</b> ,<br>5867-5871. |

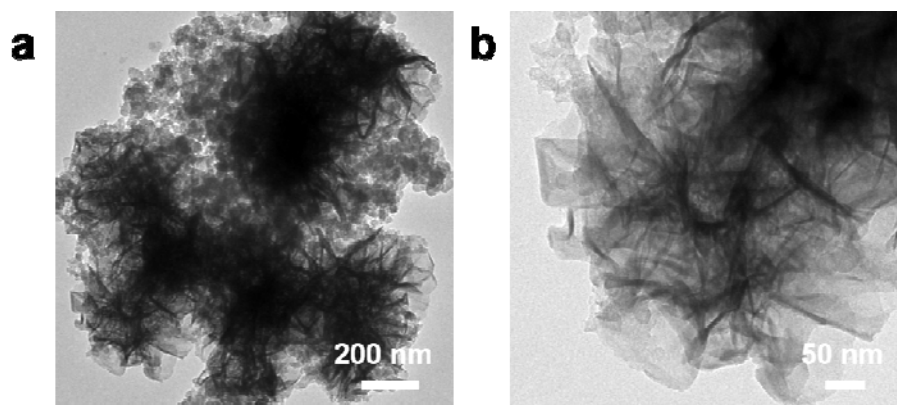

**Fig. S7** TEM images of U-LDH(SO<sub>4</sub><sup>2-</sup>) after 1000 CV cycles.

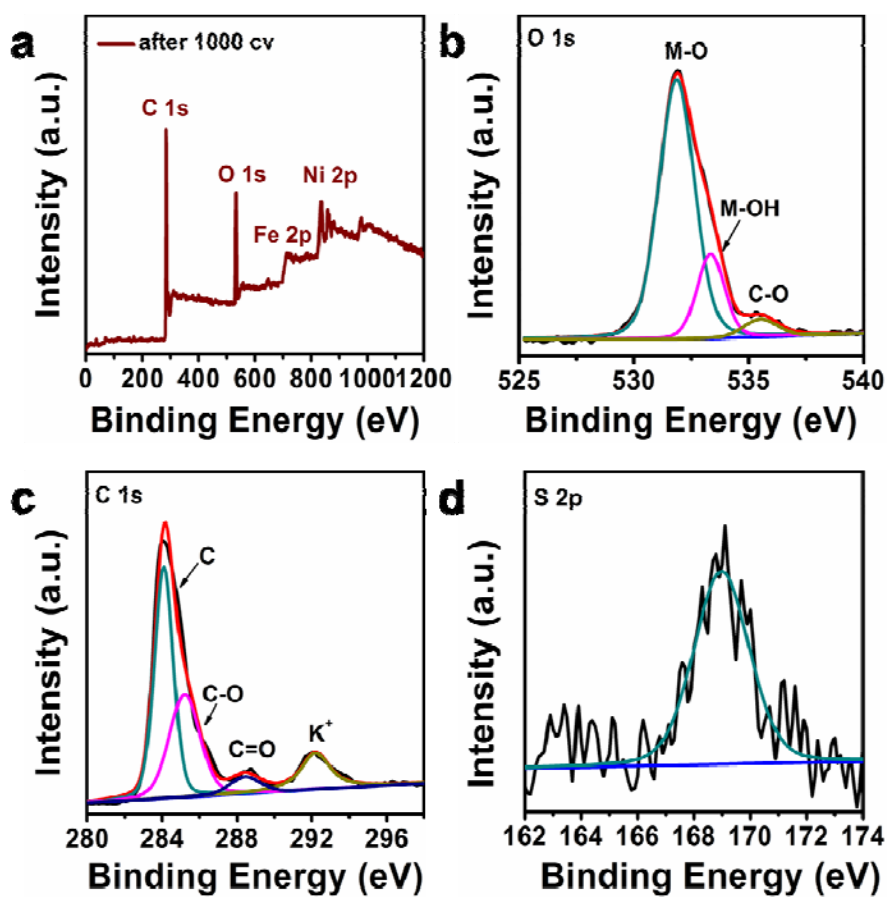

**Fig. S8** XPS spectra of U-LDH(SO<sub>4</sub><sup>2-</sup>) after 1000 CV cycles: (a) survey scan, (b) O 1s, (c) C 1s, (d) S 2p.



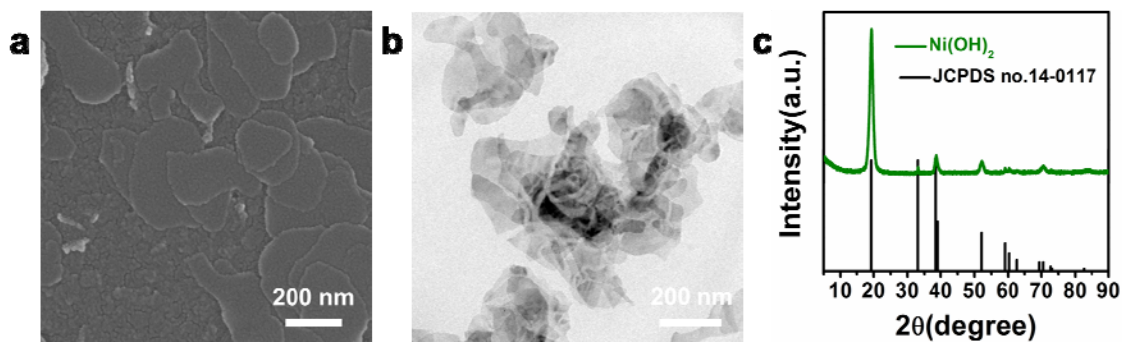

**Fig. S9** (a) SEM image, (b) TEM image, (c) PXRD patterns of  $\text{Ni}(\text{OH})_2$ .

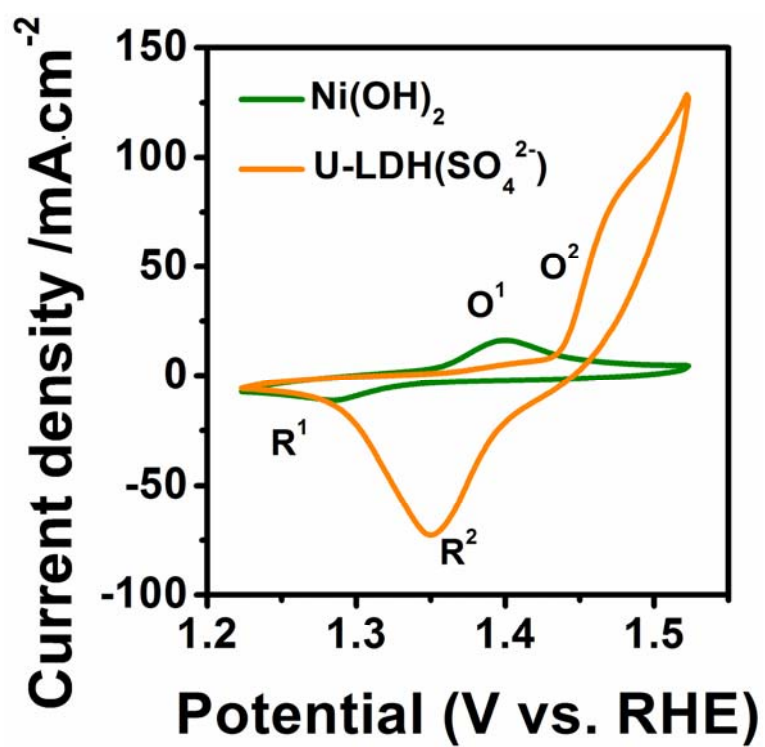

**Fig. S10** CV curves of  $\text{Ni}(\text{OH})_2$  and  $\text{U-LDH}(\text{SO}_4^{2-})$  at a scan rate of  $5 \text{ mV} \cdot \text{s}^{-1}$ .

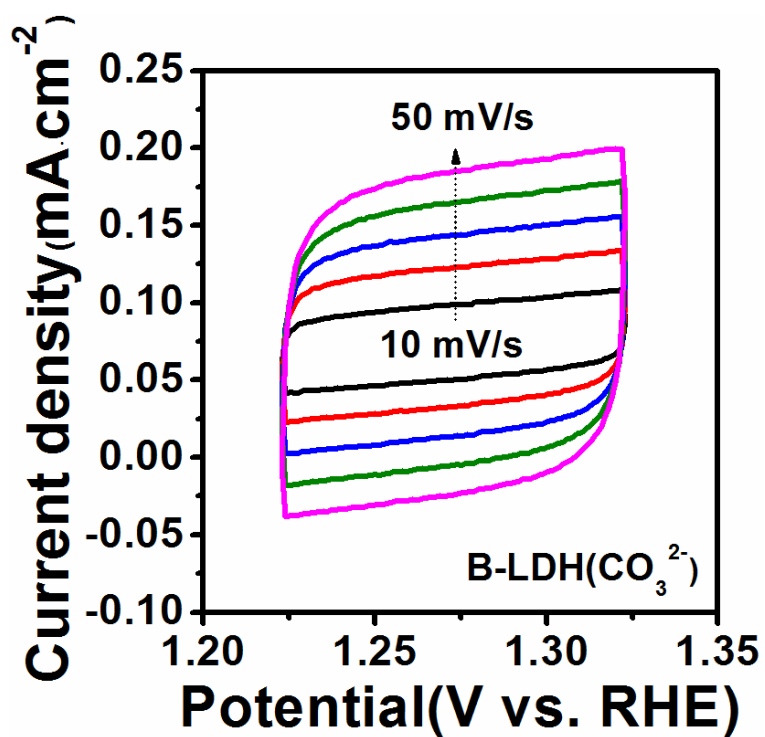

**Fig. S11** CV curves in a potential range of 1.22-1.23 V versus RHE of U-LDH(SO<sub>4</sub><sup>2-</sup>).

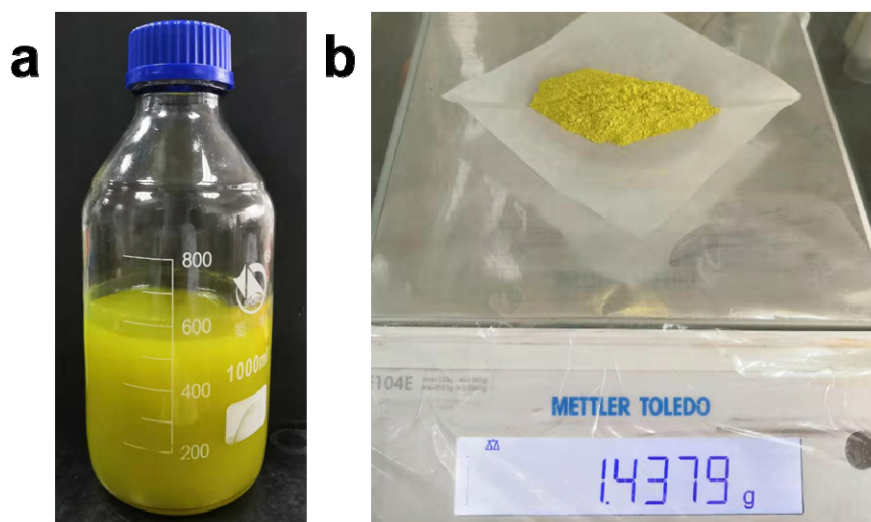

**Fig. S12** Photograph of U-LDH(SO<sub>4</sub><sup>2-</sup>) prepared in gram-scale: (a) U-LDH(SO<sub>4</sub><sup>2-</sup>) prepared in a 1 L reactor, (b) powder of U-LDH(SO<sub>4</sub><sup>2-</sup>) weighed on a precision electronic balance.

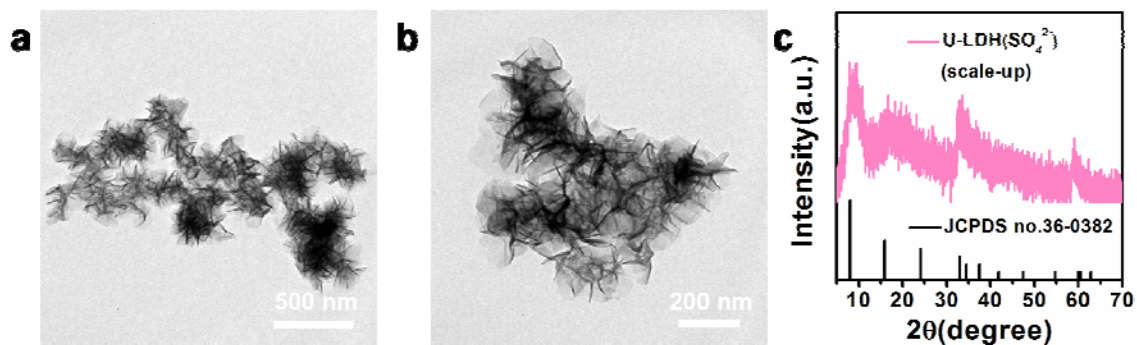

**Fig. S13** (a, b) TEM images, (c) PXRD patterns of U-LDH(SO<sub>4</sub><sup>2-</sup>) prepared in gram-scale.

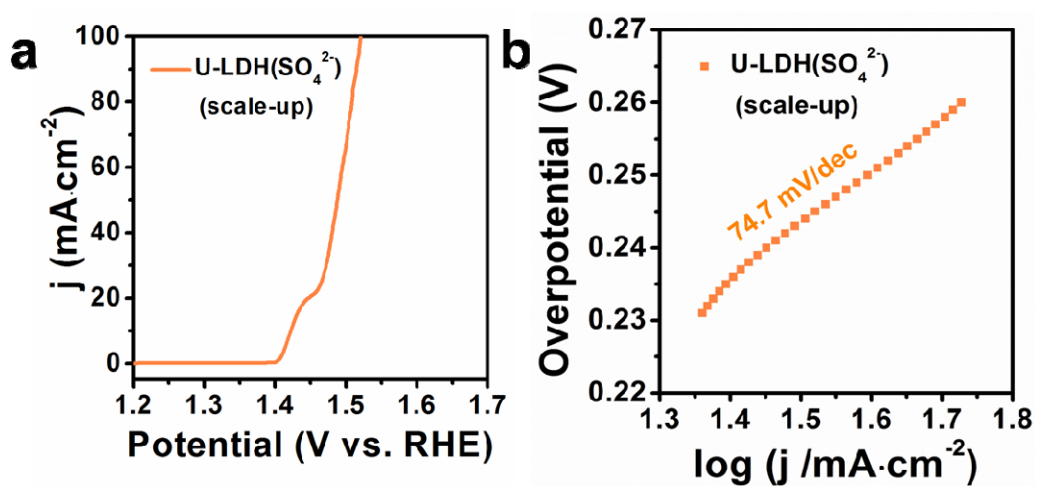

**Fig. S14** (a) Linear sweep voltammetry OER curve and (b) Tafel plot of U-LDH(SO<sub>4</sub><sup>2-</sup>) prepared in gram-scale.
